# Supplementary material
Source: HighWire-hosted journal article supplement (https://heart.bmj.com/content/107/3/229)
Supplement: inline-supplementary-material-1 [file inline-supplementary-material-1.pdf]

## **Supplementary Appendix**

### **Lower socioeconomic status predicts higher mortality and morbidity in patients with heart failure**

Schrage et al.

**Supplementary Table 1: Variable definitions**

| Variable                       | Definition                                                                                                                                                                                                                                                                                                                                    |
|--------------------------------|-----------------------------------------------------------------------------------------------------------------------------------------------------------------------------------------------------------------------------------------------------------------------------------------------------------------------------------------------|
| Education                      | University/secondary school degree or attendance of compulsory school (9 years or less), from LISA (Statistics Sweden).                                                                                                                                                                                                                       |
| Income                         | Disposable income from LISA (Statistics Sweden), median is calculated for the respective year of registration.                                                                                                                                                                                                                                |
| Cohabitation status            | Variable in SwedeHF.                                                                                                                                                                                                                                                                                                                          |
| Arterial hypertension          | Diagnosis in SwedeHF or in the NPR (ICD-10 codes: I10-I15).                                                                                                                                                                                                                                                                                   |
| Diabetes mellitus              | Diagnosis in SwedeHF or in the NPR (ICD-10 codes: E10-E14).                                                                                                                                                                                                                                                                                   |
| Obesity                        | Body mass index >30 kg/m <sup>2</sup> .                                                                                                                                                                                                                                                                                                       |
| Ischaemic heart disease        | Previous coronary revascularisation in SwedeHF or ischaemic heart disease as HF aetiology in SwedeHF or previous myocardial infarction in the NPR or previous coronary revascularisation in the NPR (ICD-10 code: I20-I25; procedure codes: FNG, FNA, FNB, FNC, FND, FNE, FNF, FNH, Z951, Z955).                                              |
| Atrial fibrillation            | Diagnosis in SwedeHF (history of atrial fibrillation or ECG showing atrial fibrillation) or in the NPR (ICD-10 code: I48).                                                                                                                                                                                                                    |
| Neurologic/psychiatric disease | Diagnosis in the NPR (ICD-10 codes: F064, F40, F41, F32, F33, F34, F20, F22, F23, F24, F25, F28, F29, F302, F312, F315, G10, G11, G12, G13, G20, G21, G22, G254, G255, G312, G318, G319, G32, G35, G36, G37, G40, G41, G931, G934, R470, R56, G041, G114, G801, G802, G81, G82, G830, G831, G832, G833, G834, G839, F00, F01, F02, F03, F04). |
| Cancer in last 3 years         | Diagnosis in the NPR within 3 years prior to the registrations in SwedeHF (ICD-10 codes: C00-C26, C30-C34, C37-C41, C43, C45-C58, C60-C76, C81-C85, C88, C90-C97).                                                                                                                                                                            |
| Anaemia                        | Haemoglobin <120 g/l in females and <130 g/l in males.                                                                                                                                                                                                                                                                                        |

|                               |                                                                                                                                                                          |
|-------------------------------|--------------------------------------------------------------------------------------------------------------------------------------------------------------------------|
| Pulmonary disease             | Diagnosis in SwedeHF (history of chronic obstructive disease; history of lung disease) or in the NPR (ICD-10 codes: J40-J47).                                            |
| Valvular heart disease        | Diagnosis in SwedeHF (history of valvular disease or valvular intervention) or in the NPR (ICD-10 codes: A520, I05-I08, I091, I098, I34-I39, Q230- Q233, Z952, Z954).    |
| Peripheral vascular disease   | Diagnosis in the NPR (ICD-10 codes: I70-I73).                                                                                                                            |
| Liver disease                 | Diagnosis in the NPR (ICD-10 codes: B18, I85, I864, I982, K70, K711, K713, K714, K715, K717, K72, K73, K74, K760, K762, K763, K764, K765, K766, K767, K768, K769, Z944). |
| Stroke/TIA                    | Diagnosis in the NPR (I61-I64, G458, G459, I639).                                                                                                                        |
| Prior revascularization       | Diagnosis in SwedeHF or in the NPR (ICD-10 code: I20-I25; procedure codes: FNG, FNA, FNB, FNC, FND, FNE, FNF, FNH, Z951, Z955).                                          |
| Heart failure hospitalisation | ICD-10 codes: I50, I42-I43, I25.5, K761, G45, J81, I11.0, I130, I132, P290 as main diagnosis in NPR                                                                      |
| Cardiovascular events         | ICD-10 codes I00-I99, K761, G45, J81 as main diagnosis in NPR and/or Cause of Death Registry                                                                             |
| Non-Cardiovascular events     | ICD-10 codes other than I00-I99, K761, G45, J81 as main diagnosis in NPR and/or Cause of Death Registry                                                                  |

**Supplementary table 2: Percentage of missing values.**

|                                         | % missing |
|-----------------------------------------|-----------|
| <b>Demographic factors</b>              |           |
| Age                                     | 0         |
| Female                                  | 0         |
| Registration                            | 0         |
| <b>Clinical factors</b>                 |           |
| Out-patient                             | <0.01     |
| HF duration                             | 0.7       |
| NYHA                                    | 25.6      |
| NT-proBNP                               | 64.2      |
| Hospitalisation for HF within 12 months | 0         |
| Heart rate                              | 0.5       |
| MAP                                     | 0.2       |
| Ejection fraction                       | 0         |
| <b>Comorbidities</b>                    |           |
| eGFR                                    | <0.01     |
| Current smoking                         | 18.5      |
| Obesity                                 | 46.3      |
| Angina                                  | 0         |
| PVD                                     | 0         |
| Liver disease                           | 0         |
| Cancer within 3 years                   | 0         |
| Bleeding                                | 0         |
| Anaemia                                 | 0.1       |
| Atrial fibrillation                     | 0         |
| Diabetes mellitus                       | 0         |
| Prior revascularisation                 | 0         |
| Ischaemic heart disease                 | 0         |
| Arterial hypertension                   | 0         |
| Valvular heart disease                  | 0         |
| Stroke/TIA                              | 0         |
| Pulmonary disease                       | 0         |
| Neurologic/psychiatric disease          | 0         |
| <b>Treatments</b>                       |           |
| ICD                                     | <0.01     |
| CRT                                     | <0.01     |
| Betablocker                             | <0.01     |
| RASi                                    | <0.01     |
| MRA                                     | <0.01     |
| Digoxin                                 | <0.01     |
| Statins                                 | <0.01     |
| Anticoagulants                          | <0.01     |
| Antiplatelets                           | <0.01     |
| Nitrates                                | <0.01     |
| Diuretics                               | 0         |
| Planned nurse-led HF follow-up          | 0.6       |
| Planned specialty care follow-up        | 0.06      |

HF: heart failure; NYHA: New York Heart Association; NT-proBNP: N-terminal pro-B-type natriuretic peptide; MAP: mean arterial pressure; eGFR: estimated glomerular filtration rate (calculated by Chronic Kidney Disease Epidemiology Collaboration formula); ICD: implantable cardioverter-defibrillator; CRT: cardiac resynchronisation therapy; RASi: renin-angiotensin-system inhibitor; MRA: mineralocorticoid receptor antagonist; PVD: peripheral vascular disease; TIA: transient ischaemic attack.

**Supplementary Table 3: Baseline characteristics stratified by number of socioeconomic risk factors in patients with heart failure with preserved ejection fraction**

|                                         | Number of socioeconomic risk factors |                       |                       |                       | P     |
|-----------------------------------------|--------------------------------------|-----------------------|-----------------------|-----------------------|-------|
|                                         | 0<br>(N=1716,<br>17%)                | 1<br>(N=3090,<br>30%) | 2<br>(N=3344,<br>32%) | 3<br>(N=2217,<br>21%) |       |
| <b>Demographic factors</b>              |                                      |                       |                       |                       |       |
| Age (years)                             | 71.58 (12.56)                        | 75.73 (11.18)         | 78.62 (10.03)         | 82.69 (8.60)          | <0.01 |
| >75 years                               | 748 (43.6%)                          | 1846 (59.7%)          | 2365 (70.7%)          | 1883 (84.9%)          | <0.01 |
| Female                                  | 363 (21.2%)                          | 1401 (45.3%)          | 2011 (60.1%)          | 1716 (77.4%)          | <0.01 |
| Registration                            |                                      |                       |                       |                       | 0.26  |
| 2000-10                                 | 700 (40.8%)                          | 1319 (32.7%)          | 1463 (43.8%)          | 946 (42.7%)           |       |
| 2011-16                                 | 1016 (59.2%)                         | 1771 (57.3%)          | 1881 (56.2%)          | 1271 (57.3%)          |       |
| <b>Clinical factors</b>                 |                                      |                       |                       |                       |       |
| Out-patient                             | 879 (51.3%)                          | 1368 (44.3%)          | 1220 (36.5%)          | 620 (28.0%)           | <0.01 |
| HF duration (days)                      | 292 [23, 1279]                       | 348 [25, 1400]        | 427 [24, 1614]        | 473 [21, 1620]        | <0.01 |
| >6 months                               | 826 (56.2%)                          | 1591 (57.5%)          | 1777 (58.9%)          | 1239 (60.6%)          | 0.04  |
| NYHA                                    |                                      |                       |                       |                       | <0.01 |
| Class I                                 | 299 (24.1%)                          | 375 (17.9%)           | 256 (12.3%)           | 143 (11.1%)           |       |
| Class II                                | 600 (48.4%)                          | 956 (45.7%)           | 905 (43.5%)           | 512 (39.7%)           |       |
| Class III                               | 298 (24.0%)                          | 689 (32.9%)           | 820 (39.4%)           | 565 (43.8%)           |       |
| Class IV                                | 43 (3.5%)                            | 73 (3.5%)             | 100 (4.8%)            | 70 (5.4%)             |       |
| NT-proBNP (pg/ml)                       | 1402 [546, 3503]                     | 1931 [719, 4405]      | 2174 [944, 4785]      | 2563 [1169, 5581]     | <0.01 |
| >2545 pg/ml                             | 218 (31.9%)                          | 487 (40.7%)           | 530 (44.2%)           | 400 (50.3%)           | <0.01 |
| Hospitalisation for HF within 12 months | 1014 (59.1%)                         | 1637 (53.0%)          | 1654 (49.5%)          | 1009 (45.5%)          | <0.01 |
| Heart rate (bpm)                        | 71.03 (14.72)                        | 72.86 (14.98)         | 74.40 (15.70)         | 75.34 (15.74)         | <0.01 |
| ≥70 bpm                                 | 825 (51.8%)                          | 1644 (56.7%)          | 1891 (60.0%)          | 1320 (62.7%)          | <0.01 |
| MAP (mmHg)                              | 91.61 (13.22)                        | 91.58 (13.11)         | 92.11 (13.24)         | 91.93 (13.36)         | 0.37  |
| ≥90 mmHg                                | 935 (55.7%)                          | 1692 (55.8%)          | 1893 (57.9%)          | 1239 (57.2%)          | 0.27  |
| <b>Comorbidities</b>                    |                                      |                       |                       |                       |       |
| eGFR (ml/min/1.73m <sup>2</sup> )       | 63.06 (23.55)                        | 58.62 (22.79)         | 54.85 (22.70)         | 50.70 (20.92)         | <0.01 |
| <60 ml/min/1.73m <sup>2</sup>           | 784 (46.2%)                          | 1672 (54.5%)          | 2065 (62.3%)          | 1515 (68.5%)          | <0.01 |
| Current smoking                         | 108 (7.6%)                           | 234 (9.4%)            | 269 (10.7%)           | 141 (8.8%)            | 0.01  |
| Obesity                                 | 234 (24.6%)                          | 489 (29.5%)           | 494 (29.7%)           | 291 (28.0%)           | 0.03  |
| Angina                                  | 466 (27.2%)                          | 951 (30.8%)           | 1081 (32.3%)          | 750 (33.8%)           | <0.01 |
| PVD                                     | 206 (12.0%)                          | 338 (10.9%)           | 380 (11.4%)           | 230 (10.4%)           | 0.41  |
| Liver disease                           | 44 (2.6%)                            | 88 (2.8%)             | 91 (2.7%)             | 53 (2.4%)             | 0.77  |
| Cancer within 3 years                   | 239 (13.9%)                          | 409 (13.2%)           | 395 (11.8%)           | 209 (9.4%)            | <0.01 |
| Bleeding                                | 360 (21.0%)                          | 717 (23.2%)           | 815 (24.4%)           | 524 (23.6%)           | 0.06  |
| Anaemia                                 | 651 (38.5%)                          | 1256 (41.2%)          | 1414 (42.8%)          | 998 (45.3%)           | <0.01 |
| Atrial fibrillation                     | 1059 (61.7%)                         | 2045 (66.2%)          | 2204 (65.9%)          | 1523 (68.7%)          | <0.01 |
| Diabetes mellitus                       | 434 (25.3%)                          | 837 (27.1%)           | 1014 (30.3%)          | 634 (28.6%)           | 0.01  |
| Prior revascularisation                 | 460 (26.8%)                          | 754 (24.4%)           | 745 (22.3%)           | 386 (17.4%)           | <0.01 |
| Ischaemic heart disease                 | 762 (44.4%)                          | 1552 (50.2%)          | 1664 (49.8%)          | 1164 (52.5%)          | <0.01 |
| Arterial hypertension                   | 1202 (70.0%)                         | 2213 (71.6%)          | 2456 (73.4%)          | 1669 (75.3%)          | 0.01  |
| Valvular heart disease                  | 613 (35.7%)                          | 1149 (37.2%)          | 1325 (39.6%)          | 891 (40.2%)           | 0.01  |

|                                         |              |              |              |              |       |
|-----------------------------------------|--------------|--------------|--------------|--------------|-------|
| <i>Stroke/TIA</i>                       | 264 (15.4%)  | 484 (15.7%)  | 592 (17.7%)  | 465 (21.0%)  | <0.01 |
| <i>Pulmonary disease</i>                | 382 (22.3%)  | 837 (27.1%)  | 1029 (30.8%) | 598 (27.0%)  | <0.01 |
| <i>Neurologic/psychiatric disease</i>   | 209 (12.2%)  | 480 (15.5%)  | 627 (18.8%)  | 372 (16.8%)  | <0.01 |
| <b>Treatments</b>                       |              |              |              |              |       |
| <i>ICD</i>                              | 27 (1.6%)    | 45 (1.5%)    | 23 (0.7%)    | 9 (0.4%)     | <0.01 |
| <i>CRT</i>                              | 22 (1.3%)    | 32 (1.0%)    | 17 (0.5%)    | 7 (0.3%)     | <0.01 |
| <i>Betablocker</i>                      | 1372 (80.4%) | 2498 (81.4%) | 2661 (79.9%) | 1723 (78.0%) | 0.03  |
| <i>RASi</i>                             | 1314 (77.2%) | 2251 (73.5%) | 2273 (68.5%) | 1463 (66.4%) | <0.01 |
| <i>MRA</i>                              | 491 (28.9%)  | 844 (27.6%)  | 959 (28.9%)  | 682 (31.0%)  | 0.07  |
| <i>Digoxin</i>                          | 249 (14.6%)  | 512 (16.7%)  | 577 (17.3%)  | 424 (19.2%)  | <0.01 |
| <i>Statins</i>                          | 750 (43.9%)  | 1292 (42.1%) | 1276 (38.3%) | 686 (31.1%)  | <0.01 |
| <i>Anticoagulants</i>                   | 799 (46.9%)  | 1299 (42.3%) | 1318 (39.6%) | 778 (35.3%)  | <0.01 |
| <i>Antiplatelets</i>                    | 646 (38.0%)  | 1324 (43.2%) | 1504 (45.3%) | 1056 (48.0%) | <0.01 |
| <i>Nitrates</i>                         | 196 (11.5%)  | 491 (16.0%)  | 662 (19.9%)  | 494 (22.4%)  | <0.01 |
| <i>Diuretics</i>                        | 1286 (74.9%) | 2500 (80.9%) | 2886 (86.3%) | 2017 (91.0%) | <0.01 |
| <i>Planned nurse-led HF follow-up</i>   | 511 (29.8%)  | 794 (25.7%)  | 729 (21.8%)  | 357 (16.1%)  | <0.01 |
| <i>Planned specialty care follow-up</i> | 960 (55.9%)  | 1407 (45.5%) | 1223 (36.6%) | 581 (26.2%)  | <0.01 |

Continuous variables are presented as mean ( $\pm$ standard deviation) and compared by one-way analysis of variance if normally distributed, and as median (25<sup>th</sup>, 75<sup>th</sup> percentile) and compared by Kruskal-Wallis test if non-normally distributed. Categorical variables are presented as absolute (relative) frequencies and compared by Chi<sup>2</sup>-test. HF: heart failure; NYHA: New York Heart Association; NT-proBNP: N-terminal pro-B-type natriuretic peptide; MAP: mean arterial pressure; eGFR: estimated glomerular filtration rate (calculated by Chronic Kidney Disease Epidemiology Collaboration formula); ICD: implantable cardioverter-defibrillator; CRT: cardiac resynchronisation therapy; RASi: renin-angiotensin-system inhibitor; MRA: mineralocorticoid receptor antagonist; PVD: peripheral vascular disease; TIA: transient ischaemic attack.

**Supplementary Table 4: Baseline characteristics stratified by number of socioeconomic risk factors in patients with heart failure with mid-range ejection fraction**

|                                         | Number of socioeconomic risk factors |                       |                       |                       | P     |
|-----------------------------------------|--------------------------------------|-----------------------|-----------------------|-----------------------|-------|
|                                         | 0<br>(N=2179,<br>22%)                | 1<br>(N=3272,<br>33%) | 2<br>(N=2941,<br>30%) | 3<br>(N=1457,<br>15%) |       |
| <b>Demographic factors</b>              |                                      |                       |                       |                       |       |
| Age (years)                             | 69.68 (12.56)                        | 73.38 (11.87)         | 76.79 (10.69)         | 81.40 (9.09)          | <0.01 |
| >75 years                               | 799 (36.7%)                          | 1615 (49.4%)          | 1843 (62.7%)          | 1168 (80.2%)          | <0.01 |
| Female                                  | 358 (16.4%)                          | 1085 (33.2%)          | 1364 (46.4%)          | 995 (68.3%)           | <0.01 |
| Registration                            |                                      |                       |                       |                       | 0.02  |
| 2000-10                                 | 966 (44.3%)                          | 1384 (42.3%)          | 1349 (45.9%)          | 666 (45.7%)           |       |
| 2011-16                                 | 1213 (55.7%)                         | 1888 (57.7%)          | 1592 (54.1%)          | 791 (54.3%)           |       |
| <b>Clinical factors</b>                 |                                      |                       |                       |                       |       |
| Out-patient                             | 1412 (64.8%)                         | 1850 (56.6%)          | 1454 (49.5%)          | 522 (35.8%)           | <0.01 |
| HF duration (days)                      | 320 [43, 1462]                       | 364 [35, 1582]        | 494 [47, 1631]        | 463 [25, 1669]        | 0.04  |
| >6 months                               | 1106 (58.7%)                         | 1716 (58.6%)          | 1643 (61.5%)          | 819 (60.0%)           | 0.12  |
| NYHA                                    |                                      |                       |                       |                       | <0.01 |
| Class I                                 | 408 (23.0%)                          | 387 (15.5%)           | 243 (11.3%)           | 91 (9.4%)             |       |
| Class II                                | 924 (52.1%)                          | 1335 (53.4%)          | 1075 (50.1%)          | 453 (46.6%)           |       |
| Class III                               | 410 (23.1%)                          | 716 (28.6%)           | 753 (35.1%)           | 384 (39.5%)           |       |
| Class IV                                | 32 (1.8%)                            | 63 (2.5%)             | 76 (3.5%)             | 44 (4.5%)             |       |
| NT-proBNP (pg/ml)                       | 1460 [529, 3628]                     | 1780 [667, 4233]      | 2263 [948, 5190]      | 3180 [1403, 7204]     | <0.01 |
| >2545 pg/ml                             | 282 (34.8%)                          | 463 (38.0%)           | 485 (46.5%)           | 271 (58.7%)           | <0.01 |
| Hospitalisation for HF within 12 months | 1473 (67.6%)                         | 2020 (61.7%)          | 1643 (55.9%)          | 733 (50.3%)           | <0.01 |
| Heart rate (bpm)                        | 70.34 (14.26)                        | 72.65 (15.35)         | 73.70 (14.83)         | 74.57 (15.84)         | <0.01 |
| ≥70 bpm                                 | 1005 (48.6%)                         | 1691 (54.8%)          | 1620 (58.5%)          | 843 (61.6%)           | <0.01 |
| MAP (mmHg)                              | 90.95 (12.61)                        | 91.40 (12.96)         | 91.88 (13.22)         | 92.82 (13.14)         | <0.01 |
| ≥90 mmHg                                | 1176 (54.8%)                         | 1817 (56.4%)          | 1623 (56.1%)          | 851 (59.8%)           | 0.03  |
| <b>Comorbidities</b>                    |                                      |                       |                       |                       |       |
| eGFR (ml/min/1.73m <sup>2</sup> )       | 67.00 (23.13)                        | 61.84 (23.61)         | 57.23 (23.61)         | 52.69 (21.46)         | <0.01 |
| <60 ml/min/1.73m <sup>2</sup>           | 812 (37.5%)                          | 1551 (47.8%)          | 1676 (57.4%)          | 931 (64.2%)           | <0.01 |
| Current smoking                         | 153 (8.3%)                           | 357 (13.1%)           | 284 (11.9%)           | 117 (10.9%)           | <0.01 |
| Obesity                                 | 297 (24.0%)                          | 489 (27.3%)           | 395 (26.5%)           | 182 (25.7%)           | 0.21  |
| Angina                                  | 674 (30.9%)                          | 1070 (32.7%)          | 1063 (36.1%)          | 530 (36.4%)           | <0.01 |
| PVD                                     | 215 (9.9%)                           | 382 (11.7%)           | 348 (11.8%)           | 172 (11.8%)           | 0.11  |
| Liver disease                           | 58 (2.7%)                            | 75 (2.3%)             | 75 (2.6%)             | 30 (2.1%)             | 0.62  |
| Cancer within 3 years                   | 288 (13.2%)                          | 366 (11.2%)           | 313 (10.6%)           | 148 (10.2%)           | 0.01  |
| Bleeding                                | 402 (18.4%)                          | 695 (21.2%)           | 624 (21.2%)           | 305 (20.9%)           | 0.05  |
| Anaemia                                 | 693 (32.3%)                          | 1146 (35.6%)          | 1124 (38.7%)          | 581 (40.3%)           | <0.01 |
| Atrial fibrillation                     | 1230 (56.4%)                         | 1965 (60.1%)          | 1842 (62.6%)          | 948 (65.1%)           | <0.01 |
| Diabetes mellitus                       | 516 (23.7%)                          | 873 (26.7%)           | 876 (29.8%)           | 442 (30.3%)           | <0.01 |
| Prior revascularisation                 | 800 (36.7%)                          | 1107 (33.8%)          | 951 (32.3%)           | 351 (24.1%)           | <0.01 |
| Ischaemic heart disease                 | 1206 (55.3%)                         | 1868 (57.1%)          | 1794 (61.0%)          | 885 (60.7%)           | <0.01 |
| Arterial hypertension                   | 1308 (60.0%)                         | 2144 (65.5%)          | 2050 (69.7%)          | 1022 (70.1%)          | <0.01 |
| Valvular heart disease                  | 634 (29.1%)                          | 934 (28.5%)           | 958 (32.6%)           | 515 (35.3%)           | <0.01 |

|                                         |              |              |              |              |       |
|-----------------------------------------|--------------|--------------|--------------|--------------|-------|
| <i>Stroke/TIA</i>                       | 301 (13.8%)  | 482 (14.7%)  | 481 (16.4%)  | 257 (17.6%)  | <0.01 |
| <i>Pulmonary disease</i>                | 373 (17.1%)  | 773 (23.6%)  | 778 (26.5%)  | 353 (24.2%)  | <0.01 |
| <i>Neurologic/psychiatric disease</i>   | 213 (9.8%)   | 433 (13.2%)  | 455 (15.5%)  | 243 (16.7%)  | <0.01 |
| <b>Treatments</b>                       |              |              |              |              |       |
| <i>ICD</i>                              | 78 (3.6%)    | 79 (2.4%)    | 50 (1.7%)    | 16 (1.1%)    | <0.01 |
| <i>CRT</i>                              | 66 (3.1%)    | 73 (2.3%)    | 42 (1.4%)    | 15 (1.0%)    | <0.01 |
| <i>Betablocker</i>                      | 1902 (87.8%) | 2843 (87.3%) | 2561 (87.4%) | 1225 (84.4%) | 0.01  |
| <i>RASi</i>                             | 1887 (87.0%) | 2732 (83.9%) | 2387 (81.6%) | 1077 (74.5%) | <0.01 |
| <i>MRA</i>                              | 561 (26.0%)  | 871 (26.8%)  | 792 (27.1%)  | 391 (27.0%)  | 0.82  |
| <i>Digoxin</i>                          | 293 (13.5%)  | 544 (16.7%)  | 477 (16.3%)  | 270 (18.6%)  | <0.01 |
| <i>Statins</i>                          | 1155 (53.2%) | 1654 (50.8%) | 1424 (48.6%) | 554 (38.2%)  | <0.01 |
| <i>Anticoagulants</i>                   | 939 (43.3%)  | 1430 (43.9%) | 1152 (39.3%) | 496 (34.3%)  | <0.01 |
| <i>Antiplatelets</i>                    | 1008 (46.6%) | 1543 (47.4%) | 1505 (51.5%) | 791 (54.7%)  | <0.01 |
| <i>Nitrates</i>                         | 256 (11.8%)  | 470 (14.5%)  | 586 (20.0%)  | 313 (21.6%)  | <0.01 |
| <i>Diuretics</i>                        | 1356 (62.2%) | 2370 (72.4%) | 2328 (79.2%) | 1254 (86.1%) | <0.01 |
| <i>Planned nurse-led HF follow-up</i>   | 800 (36.7%)  | 1088 (33.3%) | 865 (29.4%)  | 322 (22.1%)  | <0.01 |
| <i>Planned specialty care follow-up</i> | 1456 (66.8%) | 1843 (56.3%) | 1385 (47.0%) | 458 (31.4%)  | <0.01 |



**Supplementary Table 5: Baseline characteristics stratified by number of socioeconomic risk factors in patients with heart failure with reduced ejection fraction**

|                                         | Number of socioeconomic risk factors |                       |                       |                       | P     |
|-----------------------------------------|--------------------------------------|-----------------------|-----------------------|-----------------------|-------|
|                                         | 0<br>(N=5467,<br>22%)                | 1<br>(N=8238,<br>34%) | 2<br>(N=7309,<br>30%) | 3<br>(N=3411,<br>14%) |       |
| <b>Demographic factors</b>              |                                      |                       |                       |                       |       |
| Age (years)                             | 69.52 (12.23)                        | 71.70 (11.92)         | 74.92 (11.14)         | 78.43 (11.04)         | <0.01 |
| >75 years                               | 1942 (35.5%)                         | 3544 (43.0%)          | 4089 (55.9%)          | 2351 (68.9%)          | <0.01 |
| Female                                  | 690 (12.6%)                          | 1935 (23.5%)          | 2507 (34.3%)          | 1816 (53.2%)          | <0.01 |
| Registration                            |                                      |                       |                       |                       | <0.01 |
| 2000-10                                 | 2352 (43.0%)                         | 3522 (42.8%)          | 3354 (45.9%)          | 1559 (45.7%)          |       |
| 2011-16                                 | 3115 (57.0%)                         | 4716 (57.2%)          | 3955 (54.1%)          | 1852 (54.3%)          |       |
| <b>Clinical factors</b>                 |                                      |                       |                       |                       |       |
| Out-patient                             | 3232 (59.2%)                         | 4648 (56.4%)          | 3635 (49.7%)          | 1344 (39.4%)          | <0.01 |
| HF duration (days)                      | 308 [40, 1877]                       | 470 [45, 2044]        | 490 [46, 1973]        | 441 [36, 1776]        | <0.01 |
| >6 months                               | 2871 (55.5%)                         | 4645 (59.3%)          | 4256 (60.9%)          | 1938 (59.0%)          | <0.01 |
| NYHA                                    |                                      |                       |                       |                       | <0.01 |
| Class I                                 | 538 (11.7%)                          | 587 (8.9%)            | 381 (6.8%)            | 125 (5.3%)            |       |
| Class II                                | 2194 (47.9%)                         | 2905 (44.1%)          | 2281 (40.8%)          | 893 (37.7%)           |       |
| Class III                               | 1644 (35.9%)                         | 2759 (41.8%)          | 2562 (45.9%)          | 1151 (48.6%)          |       |
| Class IV                                | 208 (4.5%)                           | 343 (5.2%)            | 361 (6.5%)            | 198 (8.4%)            |       |
| NT-proBNP (pg/ml)                       | 2435 [1009, 5461]                    | 2890 [1205, 6909]     | 3800 [1556, 9073]     | 4970 [2006, 11601]    | <0.01 |
| >2545 pg/ml                             | 980 (48.2%)                          | 1651 (53.9%)          | 1520 (61.9%)          | 707 (68.6%)           | <0.01 |
| Hospitalisation for HF within 12 months | 2911 (53.2%)                         | 4217 (51.2%)          | 3484 (47.7%)          | 1441 (42.2%)          | <0.01 |
| Heart rate (bpm)                        | 72.16 (14.88)                        | 73.09 (14.89)         | 74.32 (15.58)         | 75.07 (15.53)         | <0.01 |
| ≥70 bpm                                 | 2812 (54.2%)                         | 4529 (57.9%)          | 4188 (60.1%)          | 2033 (62.8%)          | <0.01 |
| MAP (mmHg)                              | 88.91 (13.29)                        | 88.88 (13.07)         | 88.92 (13.21)         | 89.31 (13.24)         | 0.44  |
| ≥90 mmHg                                | 2560 (47.5%)                         | 3850 (47.5%)          | 3437 (47.7%)          | 1623 (48.2%)          | 0.91  |
| <b>Comorbidities</b>                    |                                      |                       |                       |                       |       |
| eGFR (ml/min/1.73m <sup>2</sup> )       | 63.99 (23.70)                        | 61.44 (24.10)         | 56.94 (23.55)         | 54.05 (23.59)         | <0.01 |
| <60 ml/min/1.73m <sup>2</sup>           | 2353 (43.3%)                         | 3971 (48.6%)          | 4179 (57.5%)          | 2138 (63.0%)          | <0.01 |
| Current smoking                         | 465 (10.0%)                          | 1029 (14.6%)          | 955 (15.8%)           | 411 (15.8%)           | <0.01 |
| Obesity                                 | 630 (19.8%)                          | 1073 (22.8%)          | 822 (21.1%)           | 321 (19.2%)           | <0.01 |
| Angina                                  | 1585 (29.0%)                         | 2725 (33.1%)          | 2463 (33.7%)          | 1179 (34.6%)          | <0.01 |
| PVD                                     | 546 (10.0%)                          | 955 (11.6%)           | 960 (13.1%)           | 421 (12.3%)           | <0.01 |
| Liver disease                           | 107 (2.0%)                           | 218 (2.6%)            | 219 (3.0%)            | 98 (2.9%)             | <0.01 |
| Cancer within 3 years                   | 645 (11.8%)                          | 926 (11.2%)           | 747 (10.2%)           | 277 (8.1%)            | <0.01 |
| Bleeding                                | 913 (16.7%)                          | 1457 (17.7%)          | 1342 (18.4%)          | 597 (17.5%)           | 0.11  |
| Anaemia                                 | 1655 (30.7%)                         | 2766 (34.1%)          | 2696 (37.3%)          | 1320 (39.0%)          | <0.01 |
| Atrial fibrillation                     | 3047 (55.7%)                         | 4565 (55.4%)          | 4129 (56.5%)          | 1934 (56.7%)          | 0.44  |
| Diabetes mellitus                       | 1331 (24.3%)                         | 2463 (29.9%)          | 2280 (31.2%)          | 1039 (30.5%)          | <0.01 |
| Prior revascularisation                 | 1994 (36.5%)                         | 3047 (37.0%)          | 2553 (34.9%)          | 945 (27.7%)           | <0.01 |
| Ischaemic heart disease                 | 3043 (55.7%)                         | 4939 (60.0%)          | 4669 (63.9%)          | 2152 (63.1%)          | <0.01 |
| Arterial hypertension                   | 3057 (55.9%)                         | 4840 (58.8%)          | 4444 (60.8%)          | 2128 (62.4%)          | <0.01 |
| Valvular heart disease                  | 1451 (26.5%)                         | 2302 (27.9%)          | 2303 (31.5%)          | 1187 (34.8%)          | <0.01 |

|                                         |              |              |              |              |       |
|-----------------------------------------|--------------|--------------|--------------|--------------|-------|
| <i>Stroke/TIA</i>                       | 774 (14.2%)  | 1264 (15.3%) | 1150 (15.7%) | 556 (16.3%)  | 0.03  |
| <i>Pulmonary disease</i>                | 923 (16.9%)  | 1741 (21.1%) | 1726 (23.6%) | 750 (22.0%)  | <0.01 |
| <i>Neurologic/psychiatric disease</i>   | 600 (11.0%)  | 1132 (13.7%) | 1137 (15.6%) | 571 (16.7%)  | <0.01 |
| <b>Treatments</b>                       |              |              |              |              |       |
| <i>ICD</i>                              | 591 (10.9%)  | 738 (9.0%)   | 430 (5.9%)   | 115 (3.4%)   | <0.01 |
| <i>CRT</i>                              | 531 (9.8%)   | 636 (7.8%)   | 414 (5.7%)   | 126 (3.7%)   | <0.01 |
| <i>Betablocker</i>                      | 5025 (92.3%) | 7544 (92.0%) | 6632 (91.0%) | 3017 (88.7%) | <0.01 |
| <i>RASi</i>                             | 4940 (90.8%) | 7346 (89.6%) | 6276 (86.2%) | 2825 (83.3%) | <0.01 |
| <i>MRA</i>                              | 1994 (36.7%) | 3051 (37.3%) | 2560 (35.3%) | 1113 (32.8%) | <0.01 |
| <i>Digoxin</i>                          | 968 (17.8%)  | 1446 (17.7%) | 1275 (17.5%) | 571 (16.8%)  | 0.68  |
| <i>Statins</i>                          | 2764 (50.8%) | 4224 (51.5%) | 3522 (48.4%) | 1369 (40.3%) | <0.01 |
| <i>Anticoagulants</i>                   | 2698 (49.5%) | 3599 (43.9%) | 2939 (40.4%) | 1088 (32.1%) | <0.01 |
| <i>Antiplatelets</i>                    | 2351 (43.3%) | 4072 (49.8%) | 3807 (52.4%) | 1901 (56.0%) | <0.01 |
| <i>Nitrates</i>                         | 652 (12.0%)  | 1215 (14.8%) | 1357 (18.7%) | 771 (22.7%)  | <0.01 |
| <i>Diuretics</i>                        | 4033 (73.8%) | 6530 (79.3%) | 6130 (83.9%) | 2958 (86.7%) | <0.01 |
| <i>Planned nurse-led HF follow-up</i>   | 2390 (43.7%) | 3440 (41.8%) | 2632 (36.0%) | 996 (29.2%)  | <0.01 |
| <i>Planned specialty care follow-up</i> | 4015 (73.4%) | 5466 (66.4%) | 4095 (56.0%) | 1416 (41.5%) | <0.01 |

**Supplementary Table 6: Baseline characteristics stratified by higher vs. lower education**

|                                         | Higher education<br>(N=22,839,<br>51%) | Lower education<br>(N=21,802,<br>49%) | P     |
|-----------------------------------------|----------------------------------------|---------------------------------------|-------|
| <b>Demographic factors</b>              |                                        |                                       |       |
| Age (years)                             | 72.00 (12.69)                          | 77.10 (10.45)                         | <0.01 |
| >75 years                               | 10379 (45.4)                           | 13814 (63.4)                          | <0.01 |
| Female                                  | 7343 (32.2)                            | 8898 (40.8)                           | <0.01 |
| Registration 2011-16                    | 13294 (58.2)                           | 11767 (54.0)                          | <0.01 |
| <b>Clinical factors</b>                 |                                        |                                       |       |
| Out-patient                             | 12259 (53.7)                           | 9925 (45.5)                           | <0.01 |
| Ejection fraction                       |                                        |                                       | <0.01 |
| Preserved (≥50%)                        | 4918 (21.5)                            | 5449 (25.0)                           |       |
| Mid-range (40-49%)                      | 5180 (22.7)                            | 4669 (21.4)                           |       |
| Reduced (<40%)                          | 12741 (55.8)                           | 11684 (53.6)                          |       |
| HF duration (days)                      | 373 [38, 1755]                         | 455 [38, 1771]                        | 0.04  |
| >6 months                               | 12254 (58.0)                           | 12173 (60.0)                          | <0.01 |
| NYHA                                    |                                        |                                       | <0.01 |
| Class I                                 | 2362 (13.4)                            | 1471 (9.5)                            |       |
| Class II                                | 8338 (47.2)                            | 6695 (43.1)                           |       |
| Class III                               | 6269 (35.5)                            | 6482 (41.7)                           |       |
| Class IV                                | 713 (4.0)                              | 898 (5.8)                             |       |
| NT-proBNP (pg/ml)                       | 2263 [900, 5461]                       | 2880 [1210, 6867]                     | <0.01 |
| >2545 pg/ml                             | 4026 (46.6)                            | 3968 (54.0)                           | <0.01 |
| Hospitalisation for HF within 12 months | 12376 (54.2)                           | 10860 (49.8)                          | <0.01 |
| Heart rate (bpm)                        | 72.85 (15.03)                          | 73.91 (15.44)                         | <0.01 |
| ≥70 bpm                                 | 12255 (56.6)                           | 12146 (59.0)                          | <0.01 |
| MAP (mmHg)                              | 90.05 (13.24)                          | 90.40 (13.21)                         | <0.01 |
| ≥90 mmHg                                | 11501 (51.2)                           | 11195 (52.2)                          | 0.03  |
| <b>Comorbidities</b>                    |                                        |                                       |       |
| eGFR (ml/min/1.73m <sup>2</sup> )       | 61.98 (24.21)                          | 55.94 (22.80)                         | <0.01 |
| <60 ml/min/1.73m <sup>2</sup>           | 10905 (48.1)                           | 12742 (58.8)                          | <0.01 |
| Current smoking                         | 2443 (12.8)                            | 2080 (12.0)                           | 0.02  |
| Obesity                                 | 3030 (23.7)                            | 2687 (24.0)                           | 0.63  |
| Angina                                  | 6951 (30.4)                            | 7586 (34.8)                           | <0.01 |
| PVD                                     | 2505 (11.0)                            | 2648 (12.1)                           | <0.01 |
| Liver disease                           | 653 (2.9)                              | 503 (2.3)                             | <0.01 |
| Cancer within 3 years                   | 2556 (11.2)                            | 2406 (11.0)                           | 0.61  |
| Bleeding                                | 4389 (19.2)                            | 4362 (20.0)                           | 0.04  |
| Anaemia                                 | 7792 (34.6)                            | 8508 (39.4)                           | <0.01 |
| Atrial fibrillation                     | 13146 (57.6)                           | 13345 (61.2)                          | <0.01 |
| Diabetes mellitus                       | 6092 (26.7)                            | 6647 (30.5)                           | <0.01 |
| Prior revascularisation                 | 7312 (32.0)                            | 6781 (31.1)                           | 0.04  |
| Ischaemic heart disease                 | 12513 (54.8)                           | 13185 (60.5)                          | <0.01 |
| Arterial hypertension                   | 14115 (61.8)                           | 14418 (66.1)                          | <0.01 |
| Valvular heart disease                  | 6905 (30.2)                            | 7357 (33.7)                           | <0.01 |
| Stroke/TIA                              | 3432 (15.0)                            | 3638 (16.7)                           | <0.01 |

|                                         |              |              |       |
|-----------------------------------------|--------------|--------------|-------|
| <i>Pulmonary disease</i>                | 4911 (21.5)  | 5352 (24.5)  | <0.01 |
| <i>Neurologic/psychiatric disease</i>   | 3327 (14.6)  | 3145 (14.4)  | 0.68  |
| <b>Treatments</b>                       |              |              |       |
| <i>ICD</i>                              | 1392 (6.1)   | 809 (3.7)    | <0.01 |
| <i>CRT</i>                              | 1228 (5.4)   | 753 (3.5)    | <0.01 |
| <i>Betablocker</i>                      | 20104 (88.4) | 18899 (87.0) | <0.01 |
| <i>RASi</i>                             | 19297 (84.9) | 17474 (80.6) | <0.01 |
| <i>MRA</i>                              | 7430 (32.8)  | 6879 (31.8)  | 0.02  |
| <i>Digoxin</i>                          | 3875 (17.0)  | 3731 (17.2)  | 0.70  |
| <i>Statins</i>                          | 10805 (47.5) | 9865 (45.4)  | <0.01 |
| <i>Anticoagulants</i>                   | 9879 (43.5)  | 8656 (39.9)  | <0.01 |
| <i>Antiplatelets</i>                    | 10493 (46.3) | 11015 (50.8) | <0.01 |
| <i>Nitrates</i>                         | 3182 (14.0)  | 4281 (19.7)  | <0.01 |
| <i>Diuretics</i>                        | 17485 (76.6) | 18163 (83.3) | <0.01 |
| <i>Planned nurse-led HF follow-up</i>   | 13124 (61.2) | 13874 (67.9) | <0.01 |
| <i>Planned specialty care follow-up</i> | 7541 (35.1)  | 10172 (49.6) | <0.01 |

**Supplementary Table 7: Baseline characteristics stratified by higher vs. lower income**

|                                         | <b>Higher income</b><br>(N=22,855,<br>51%) | <b>Lower income</b><br>(N=21,786,<br>49%) | <b>P</b> |
|-----------------------------------------|--------------------------------------------|-------------------------------------------|----------|
| <b>Demographic factors</b>              |                                            |                                           |          |
| Age (years)                             | 72.13 (12.36)                              | 76.96 (10.92)                             | <0.01    |
| >75 years                               | 10371 (45.4)                               | 13822 (63.4)                              | <0.01    |
| Female                                  | 5217 (22.8)                                | 11024 (50.6)                              | <0.01    |
| Registration 2011-16                    | 12801 (56.0)                               | 12260 (56.3)                              | 0.58     |
| <b>Clinical factors</b>                 |                                            |                                           |          |
| Out-patient                             | 12384 (54.2)                               | 9800 (45.0)                               | <0.01    |
| Ejection fraction                       |                                            |                                           | <0.01    |
| Preserved (≥50%)                        | 4644 (20.3)                                | 5723 (26.3)                               |          |
| Mid-range (40-49%)                      | 5160 (22.6)                                | 4689 (21.5)                               |          |
| Reduced (<40%)                          | 13051 (57.1)                               | 11374 (52.2)                              |          |
| HF duration (days)                      | 352 [37, 1722]                             | 477 [39, 1803]                            | <0.01    |
| >6 months                               | 12114 (57.5)                               | 12313 (60.4)                              | <0.01    |
| NYHA                                    |                                            |                                           | <0.01    |
| Class I                                 | 2454 (13.8)                                | 1379 (8.9)                                |          |
| Class II                                | 8389 (47.2)                                | 6644 (43.0)                               |          |
| Class III                               | 6202 (34.9)                                | 6549 (42.4)                               |          |
| Class IV                                | 729 (4.1)                                  | 882 (5.7)                                 |          |
| NT-proBNP (pg/ml)                       | 2260 [900, 5436]                           | 2890 [1200, 6940]                         | <0.01    |
| >2545 pg/ml                             | 3864 (46.3)                                | 4130 (54.0)                               | <0.01    |
| Hospitalisation for HF within 12 months | 12476 (54.6)                               | 10760 (49.4)                              | <0.01    |
| Heart rate (bpm)                        | 72.54 (14.94)                              | 74.23 (15.50)                             | <0.01    |
| ≥70 bpm                                 | 12005 (55.5)                               | 12396 (60.1)                              | <0.01    |
| MAP (mmHg)                              | 90.04 (13.15)                              | 90.41 (13.30)                             | 0.01     |
| ≥90 mmHg                                | 11541 (51.3)                               | 11155 (52.1)                              | 0.11     |
| <b>Comorbidities</b>                    |                                            |                                           |          |
| eGFR (ml/min/1.73m <sup>2</sup> )       | 62.08 (23.87)                              | 55.83 (23.14)                             | <0.01    |
| <60 ml/min/1.73m <sup>2</sup>           | 10770 (47.5)                               | 12877 (59.5)                              | <0.01    |
| Current smoking                         | 2317 (12.1)                                | 2206 (12.7)                               | 0.09     |
| Obesity                                 | 2985 (23.3)                                | 2732 (24.5)                               | 0.03     |
| Angina                                  | 7031 (30.8)                                | 7506 (34.5)                               | <0.01    |
| PVD                                     | 2528 (11.1)                                | 2625 (12.0)                               | 0.01     |
| Liver disease                           | 534 (2.3)                                  | 622 (2.9)                                 | 0.01     |
| Cancer within 3 years                   | 2750 (12.0)                                | 2212 (10.2)                               | <0.01    |
| Bleeding                                | 4372 (19.1)                                | 4379 (20.1)                               | 0.01     |
| Anaemia                                 | 7965 (35.3)                                | 8335 (38.7)                               | <0.01    |
| Atrial fibrillation                     | 13405 (58.7)                               | 13086 (60.1)                              | <0.01    |
| Diabetes mellitus                       | 6096 (26.7)                                | 6643 (30.5)                               | <0.01    |
| Prior revascularisation                 | 7614 (33.3)                                | 6479 (29.7)                               | <0.01    |
| Ischaemic heart disease                 | 12689 (55.5)                               | 13009 (59.7)                              | <0.01    |
| Arterial hypertension                   | 14050 (61.5)                               | 14483 (66.5)                              | <0.01    |
| Valvular heart disease                  | 6793 (29.7)                                | 7469 (34.3)                               | <0.01    |
| Stroke/TIA                              | 3408 (14.9)                                | 3662 (16.8)                               | <0.01    |

|                                         |              |              |       |
|-----------------------------------------|--------------|--------------|-------|
| <i>Pulmonary disease</i>                | 4796 (21.0)  | 5467 (25.1)  | <0.01 |
| <i>Neurologic/psychiatric disease</i>   | 2897 (12.7)  | 3575 (16.4)  | <0.01 |
| <b>Treatments</b>                       |              |              |       |
| <i>ICD</i>                              | 1402 (6.2)   | 799 (3.7)    | <0.01 |
| <i>CRT</i>                              | 1233 (5.4)   | 748 (3.5)    | <0.01 |
| <i>Betablocker</i>                      | 20142 (88.5) | 18861 (86.9) | <0.01 |
| <i>RASi</i>                             | 19318 (85.0) | 17453 (80.5) | <0.01 |
| <i>MRA</i>                              | 7421 (32.7)  | 6888 (31.8)  | 0.05  |
| <i>Digoxin</i>                          | 3835 (16.9)  | 3771 (17.4)  | 0.15  |
| <i>Statins</i>                          | 10951 (48.1) | 9719 (44.8)  | <0.01 |
| <i>Anticoagulants</i>                   | 10138 (44.6) | 8397 (38.7)  | <0.01 |
| <i>Antiplatelets</i>                    | 10470 (46.1) | 11038 (51.0) | <0.01 |
| <i>Nitrates</i>                         | 3161 (13.9)  | 4302 (19.9)  | <0.01 |
| <i>Diuretics</i>                        | 17323 (75.8) | 18325 (84.1) | <0.01 |
| <i>Planned nurse-led HF follow-up</i>   | 13220 (61.6) | 13778 (67.5) | <0.01 |
| <i>Planned specialty care follow-up</i> | 7482 (34.8)  | 10231 (49.9) | <0.01 |

**Supplementary Table 8: Baseline characteristics stratified by living alone vs. cohabitating**

|                                         | <b>Cohabiting</b><br>(N=25,186,<br>56%) | <b>Living alone</b><br>(N=19,455,<br>44%) | <b>P</b> |
|-----------------------------------------|-----------------------------------------|-------------------------------------------|----------|
| <b>Demographic factors</b>              |                                         |                                           |          |
| Age (years)                             | 72.94 (11.33)                           | 76.49 (12.37)                             | <0.01    |
| >75 years                               | 12024 (47.7)                            | 12169 (62.5)                              | <0.01    |
| Female                                  | 6397 (25.4)                             | 9844 (50.6)                               | <0.01    |
| Registration 2011-16                    | 14115 (56.0)                            | 10946 (56.3)                              | 0.65     |
| <b>Clinical factors</b>                 |                                         |                                           |          |
| Out-patient                             | 13967 (55.5)                            | 8217 (42.2)                               | <0.01    |
| Ejection fraction                       |                                         |                                           | <0.01    |
| Preserved (≥50%)                        | 5110 (20.3)                             | 5257 (27.0)                               |          |
| Mid-range (40-49%)                      | 5682 (22.6)                             | 4167 (21.4)                               |          |
| Reduced (<40%)                          | 14394 (57.2)                            | 10031 (51.6)                              |          |
| HF duration (days)                      | 400 [41, 1788]                          | 428 [34, 1740]                            | 0.05     |
| >6 months                               | 13621 (58.9)                            | 10806 (59.0)                              | 0.82     |
| NYHA                                    |                                         |                                           | <0.01    |
| Class I                                 | 2497 (12.8)                             | 1336 (9.8)                                |          |
| Class II                                | 9080 (46.5)                             | 5953 (43.4)                               |          |
| Class III                               | 7048 (36.1)                             | 5703 (41.6)                               |          |
| Class IV                                | 902 (4.6)                               | 709 (5.2)                                 |          |
| NT-proBNP (pg/ml)                       | 2271 [923, 5400]                        | 2971 [1203, 7158]                         | <0.01    |
| >2545 pg/ml                             | 4287 (46.4)                             | 3707 (54.9)                               | <0.01    |
| Hospitalisation for HF within 12 months | 13871 (55.1)                            | 9365 (48.1)                               | <0.01    |
| Heart rate (bpm)                        | 72.49 (15.07)                           | 74.49 (15.38)                             | <0.01    |
| ≥70 bpm                                 | 13093 (55.1)                            | 11308 (61.1)                              | <0.01    |
| MAP (mmHg)                              | 89.99 (13.14)                           | 90.51 (13.33)                             | <0.01    |
| ≥90 mmHg                                | 12642 (51.0)                            | 10054 (52.6)                              | 0.01     |
| <b>Comorbidities</b>                    |                                         |                                           |          |
| eGFR (ml/min/1.73m <sup>2</sup> )       | 60.55 (23.30)                           | 57.05 (24.12)                             | <0.01    |
| <60 ml/min/1.73m <sup>2</sup>           | 12480 (49.9)                            | 11167 (57.7)                              | <0.01    |
| Current smoking                         | 2166 (10.3)                             | 2357 (15.4)                               | <0.01    |
| Obesity                                 | 3281 (23.7)                             | 2436 (24.0)                               | 0.62     |
| Angina                                  | 8292 (32.9)                             | 6245 (32.1)                               | 0.07     |
| PVD                                     | 2906 (11.5)                             | 2247 (11.5)                               | 0.98     |
| Liver disease                           | 587 (2.3)                               | 569 (2.9)                                 | <0.01    |
| Cancer within 3 years                   | 3067 (12.2)                             | 1895 (9.7)                                | <0.01    |
| Bleeding                                | 4783 (19.0)                             | 3968 (20.4)                               | <0.01    |
| Anaemia                                 | 8810 (35.5)                             | 7490 (38.9)                               | <0.01    |
| Atrial fibrillation                     | 14782 (58.7)                            | 11709 (60.2)                              | 0.01     |
| Diabetes mellitus                       | 7171 (28.5)                             | 5568 (28.6)                               | 0.74     |
| Prior revascularisation                 | 8901 (35.3)                             | 5192 (26.7)                               | <0.01    |
| Ischaemic heart disease                 | 14676 (58.3)                            | 11022 (56.7)                              | 0.01     |
| Arterial hypertension                   | 15880 (63.1)                            | 12653 (65.0)                              | <0.01    |
| Valvular heart disease                  | 7752 (30.8)                             | 6510 (33.5)                               | <0.01    |
| Stroke/TIA                              | 3860 (15.3)                             | 3210 (16.5)                               | 0.01     |

|                                         |              |              |       |
|-----------------------------------------|--------------|--------------|-------|
| <i>Pulmonary disease</i>                | 5562 (22.1)  | 4701 (24.2)  | <0.01 |
| <i>Neurologic/psychiatric disease</i>   | 3151 (12.5)  | 3321 (17.1)  | <0.01 |
| <b>Treatments</b>                       |              |              |       |
| <i>ICD</i>                              | 1521 (6.1)   | 680 (3.5)    | <0.01 |
| <i>CRT</i>                              | 1351 (5.4)   | 630 (3.3)    | <0.01 |
| <i>Betablocker</i>                      | 22275 (88.8) | 16728 (86.3) | <0.01 |
| <i>RASi</i>                             | 21402 (85.4) | 15369 (79.5) | <0.01 |
| <i>MRA</i>                              | 8130 (32.5)  | 6179 (32.0)  | 0.27  |
| <i>Digoxin</i>                          | 4153 (16.6)  | 3453 (17.8)  | <0.01 |
| <i>Statins</i>                          | 12813 (51.1) | 7857 (40.6)  | <0.01 |
| <i>Anticoagulants</i>                   | 11356 (45.3) | 7179 (37.1)  | <0.01 |
| <i>Antiplatelets</i>                    | 11746 (46.9) | 9762 (50.5)  | <0.01 |
| <i>Nitrates</i>                         | 3926 (15.7)  | 3537 (18.3)  | <0.01 |
| <i>Diuretics</i>                        | 19361 (76.9) | 16287 (83.7) | <0.01 |
| <i>Planned nurse-led HF follow-up</i>   | 14408 (60.7) | 12590 (69.4) | <0.01 |
| <i>Planned specialty care follow-up</i> | 8389 (35.2)  | 9324 (51.3)  | <0.01 |



**Supplementary Table 9: Association between individual socioeconomic risk factors and heart failure hospitalization or all-cause death**

| Socioeconomic risk factor | Unadjusted HR (95% CI) | P-value | Adjusted HR (95%CI) | P-value |
|---------------------------|------------------------|---------|---------------------|---------|
| Low income                | 1.25 (1.22-1.28)       | <0.01   | 1.08 (1.05-1.10)    | <0.01   |
| Living alone              | 1.30 (1.27-1.33)       | <0.01   | 1.12 (1.09-1.14)    | <0.01   |
| Compulsory school         | 1.21 (1.18-1.24)       | <0.01   | 1.03 (1.01-1.06)    | 0.01    |

Unadjusted and adjusted hazard ratios (HR) and 95% confidence intervals (CI) for the association between individual socioeconomic risk factors and first heart failure hospitalisation or all-cause death. For variables used for the adjustment, see *Figure 4*.

**Supplementary Figure 1: Association of patient characteristics with socioeconomic status in patients with heart failure with preserved ejection fraction**

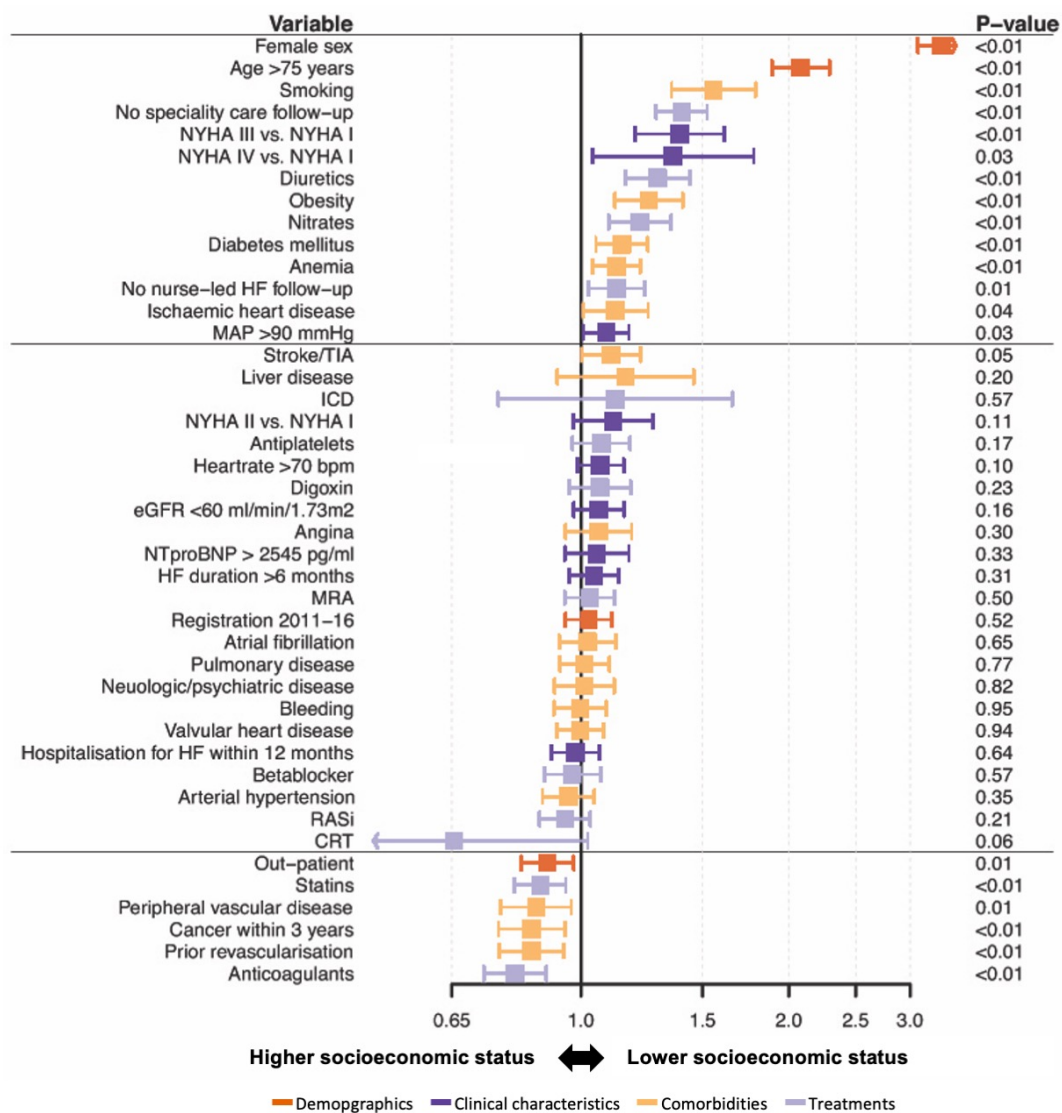

Odds ratios are shown on the x-axis, with an odds ratio below 1.0 indicating an association with higher socioeconomic status and an odds ratio above 1.0 indicating an association with a lower socioeconomic status. NYHA: New York Heart Association; NTproBNP: N-terminal pro-B-type natriuretic peptide; HHF: heart failure hospitalisation; MAP: mean arterial pressure; eGFR: estimated glomerular filtration rate (calculated by Chronic Kidney Disease Epidemiology Collaboration formula); ICD: implantable cardioverter-defibrillator; CRT: cardiac resynchronisation therapy; RASi: renin-angiotensin-system inhibitor; MRA: mineralocorticoid receptor antagonist; TIA: transient ischemic attack.

**Supplementary Figure 2: Association of patient characteristics with socioeconomic status in patients with heart failure with mid-range ejection fraction**

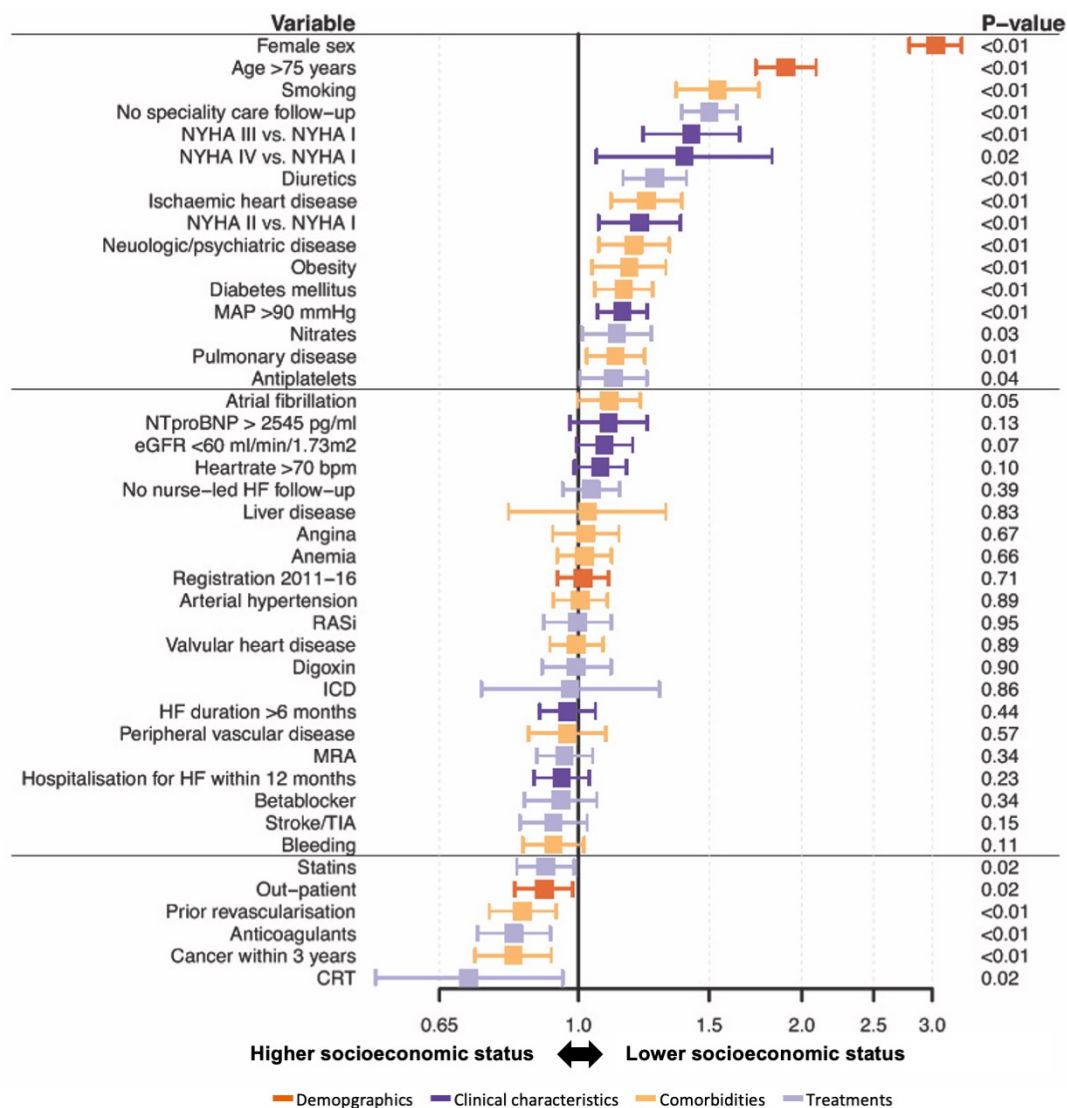

**Supplementary Figure 3: Association of patient characteristics with socioeconomic status in patients with heart failure with reduced ejection fraction**

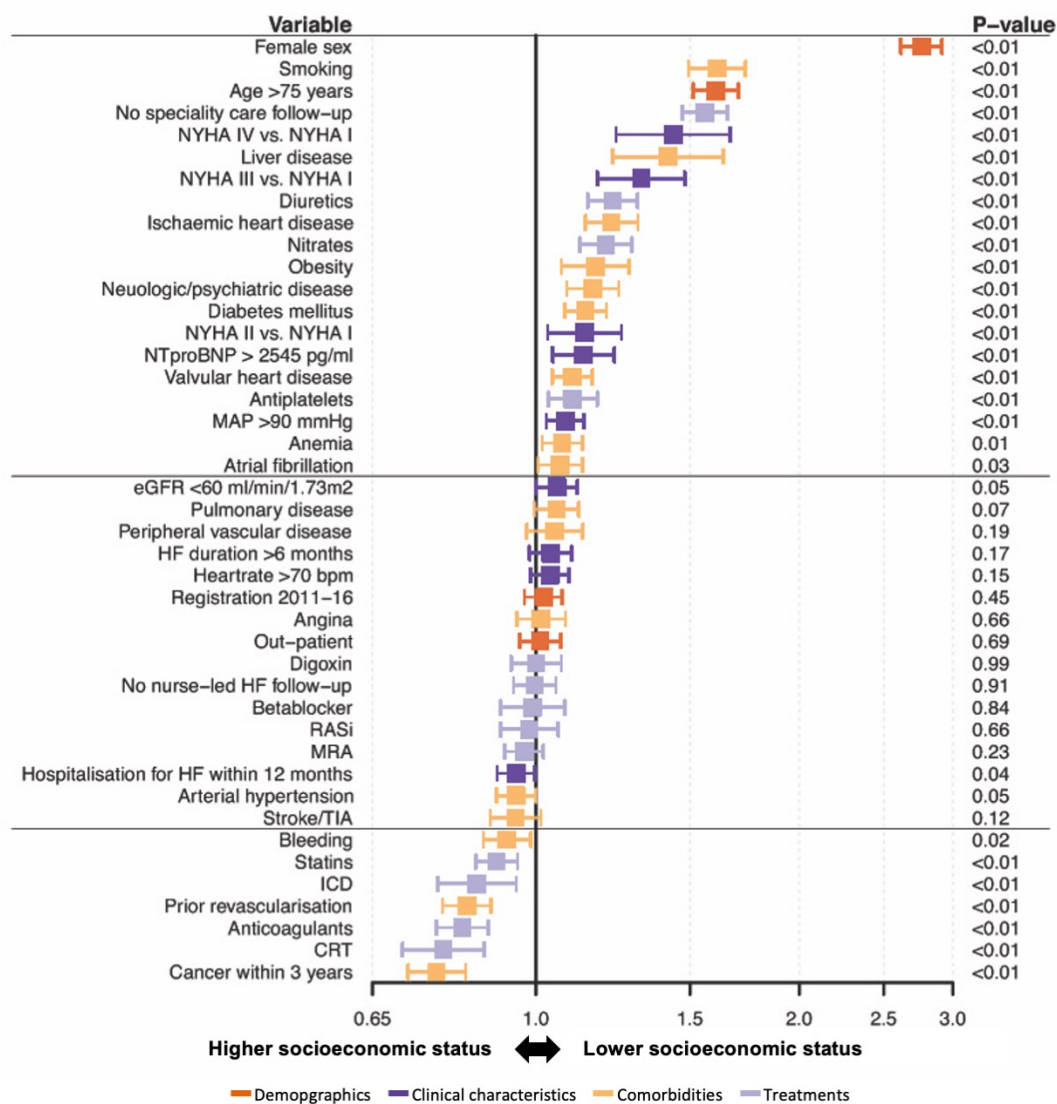

### Supplementary Figure 4: Association between clusters of socioeconomic risk factors and heart failure hospitalization or all-cause death

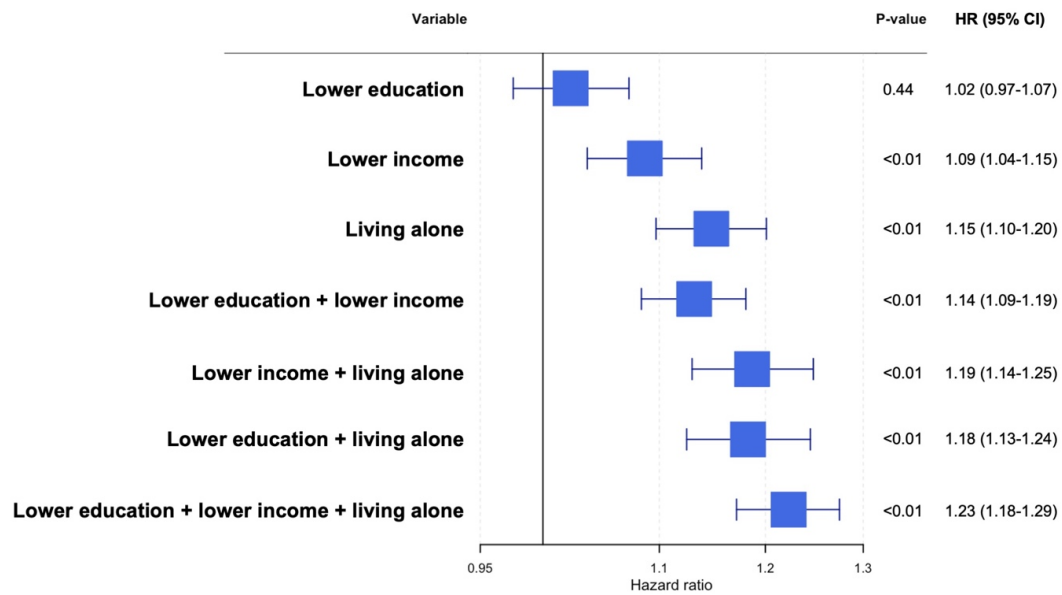

For variables used for the adjustment, see *Figure 4*. HR: hazard ratio; CI: confidence interval.

**Supplementary Figure 5: Association between number of socioeconomic risk factors and heart failure hospitalization or all-cause death stratified by ejection fraction**

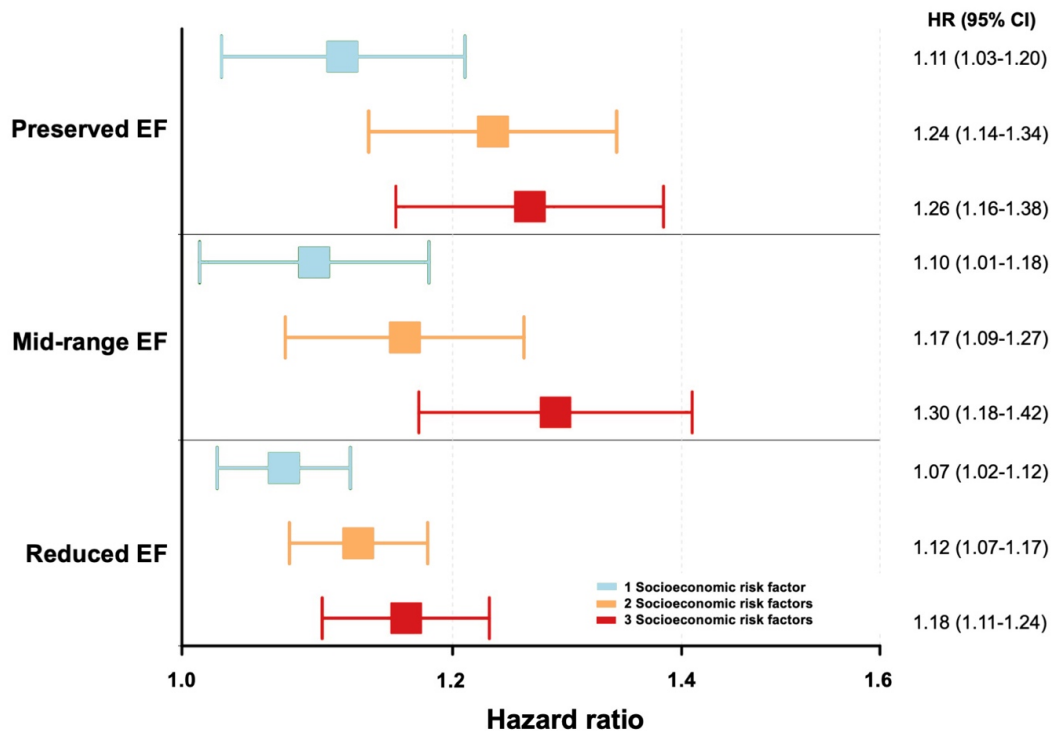

Reference level was "0 socioeconomic risk factors". For variables used for the adjustment, see *Figure 4*. EF: ejection fraction.  
HR: hazard ratio; CI: confidence interval.

**Supplementary Figure 6: Association between socioeconomic status and heart failure hospitalization or all-cause death in females vs. males**

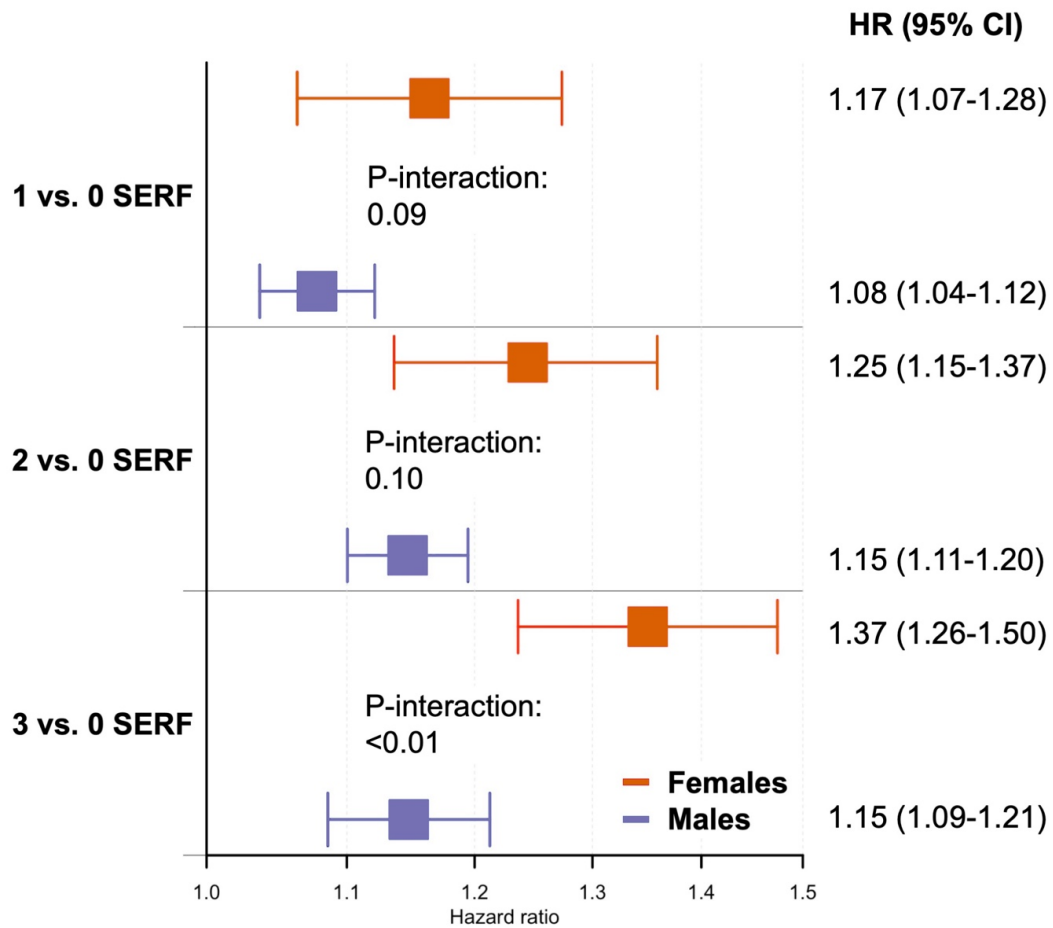

Adjustments in the Cox regression model were made for the interaction between sex and the total number of socioeconomic risk factors. Additional variables used for the adjustment are shown in *Figure 4*. HR: hazard ratio; CI: confidence interval.

## Supplementary Figure 7: Association between socioeconomic status and cardiovascular/non-cardiovascular events

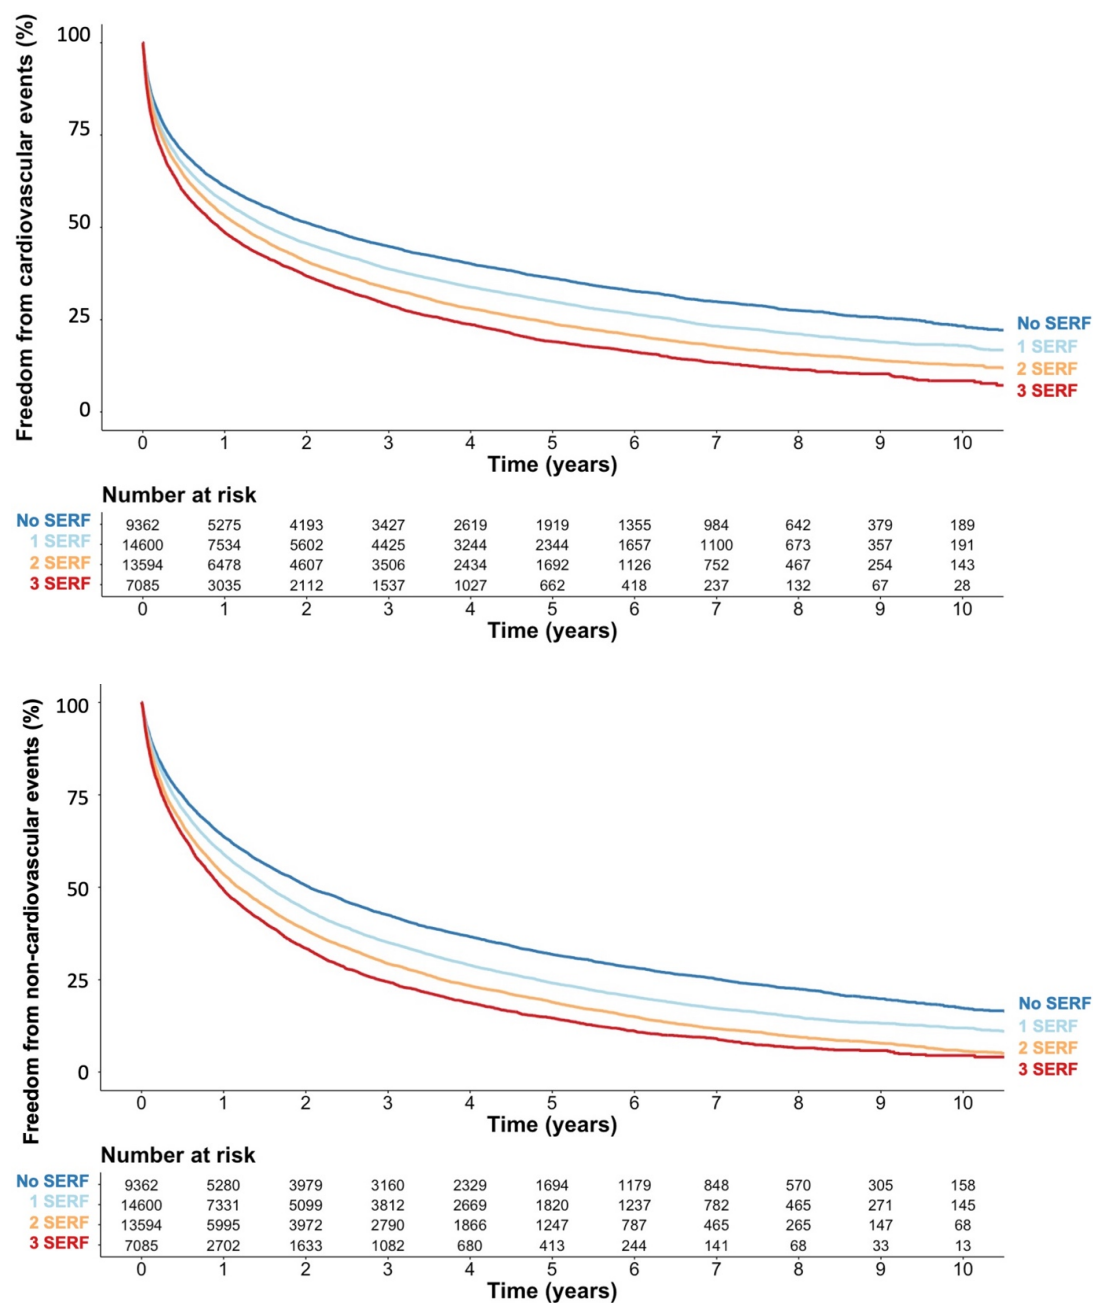

Kaplan Meier curves for cardiovascular/non-cardiovascular events are shown per number of socioeconomic risk factors (SERF). In the fully adjusted Cox regression model (see Figure 4), higher number of SERF was associated with a similarly increased risk of cardiovascular vs. non-cardiovascular events: hazard ratio 1.07 (95%CI 1.03-1.10) vs. 1.07 (95% CI 1.03-1.10,  $p=0.48$ ) for 1 vs. 0 SERF; 1.08 (95% CI 1.04-1.12) vs. 1.11 (95% CI 1.07-1.15,  $p=0.13$ ) for 2 vs. 0 SERF; 1.10 (95% CI 1.06-1.15) vs. 1.12 (95% CI 1.07-1.16,  $p=0.32$ ) for 3 vs. 0 SERF. CI: confidence interval.



### Supplementary Figure 8: Association between socioeconomic status and heart failure hospitalization/all-cause death

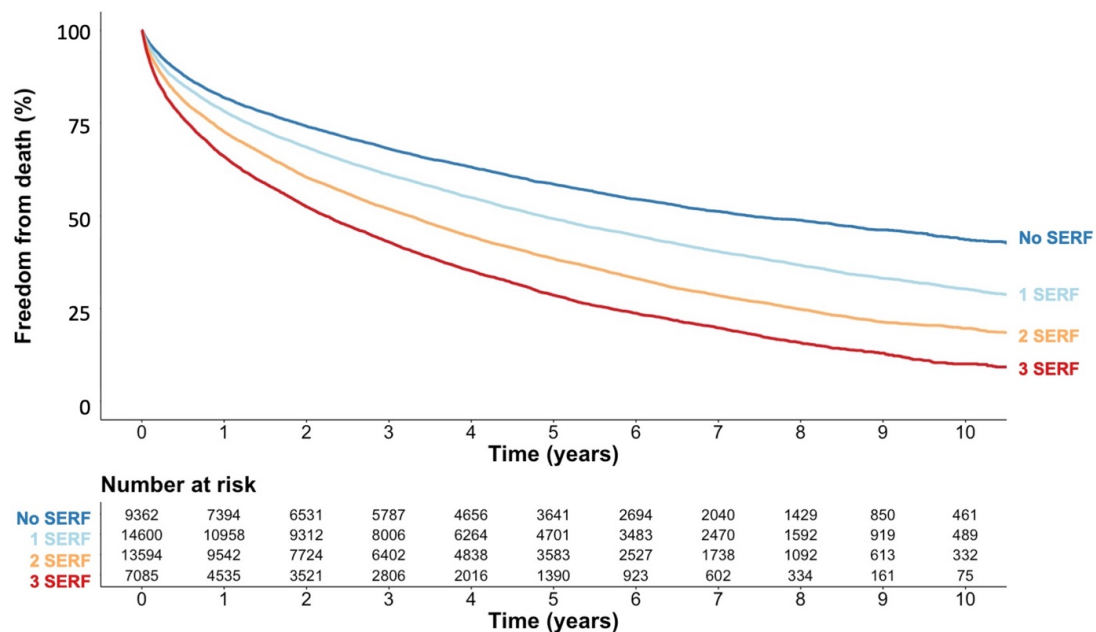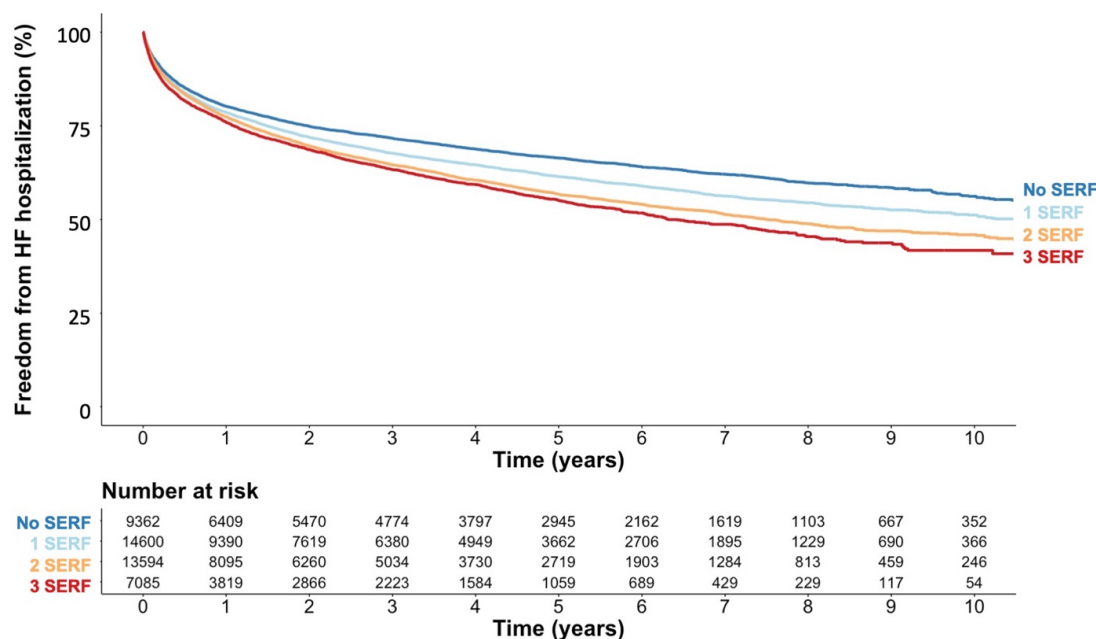

Kaplan Meier curves for heart failure hospitalisation and all-cause death are shown per number of socioeconomic risk factors (SERF). In the fully adjusted Cox regression model (see Figure 4), higher number of SERF was associated with an increased risk of all-cause death but not with heart failure hospitalization: hazard ratio 1.12 (95% CI 1.08-1.16) vs. 1.05 (95% CI 1.00-1.10, p=0.01) for 1 vs. 0 SERF; 1.24 (95% CI 1.19-1.29) vs. 1.04 (95% CI 0.99-1.09, p<0.01) for 2 vs. 0 SERF; 1.36 (95% CI 1.30-1.42) vs. 1.02 (95% CI 0.96-1.08, p1<0.01) for 3 vs. 0 SERF. CI: confidence interval.
